# Supplementary material
Source: Springer Nature journal article supplement (https://www.springermedizin.de/resource/supplementary/12985_2009_539_MOESM3_ESM.pdf/9608406)

**A. MOI=10**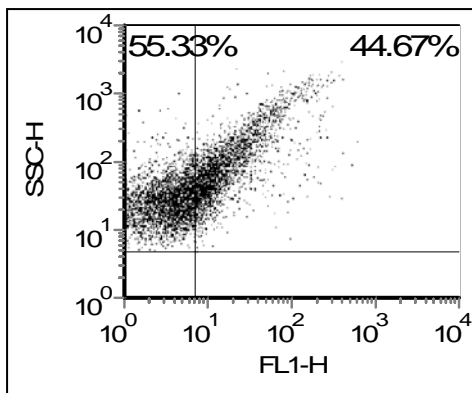**B. MOI=100**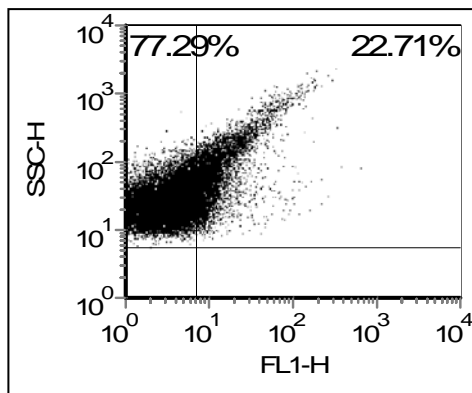**C. anti-hexon Ab 1:1**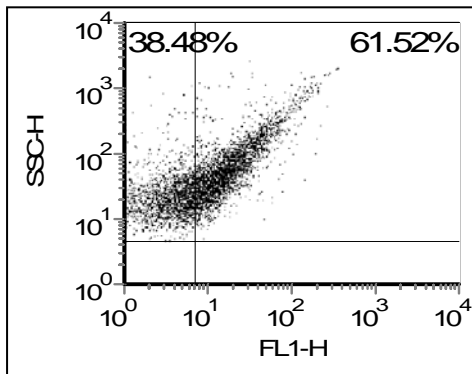**D. anti-hexon Ab 1:8**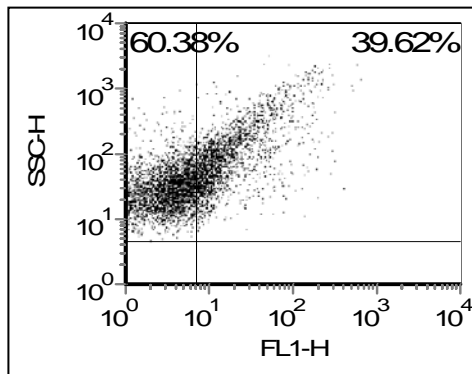

Supplement: MOESM3 [file 9608406]
